# Supplementary material
Source: PubMed Central journal article supplement (PMC7533833)
Supplement: pnas.2004334117.sapp.pdf [file pnas.2004334117.sapp.pdf]

## Overstated carbon emission reductions from voluntary REDD+ projects in the Brazilian Amazon

Thales A. P. West<sup>1,2,3\*</sup>, Jan Börner<sup>3,4</sup>, Erin O. Sills<sup>5</sup>, Andreas Kontoleon<sup>2,6</sup>

<sup>1</sup> Scion—New Zealand Forest Research Institute, Rotorua, New Zealand

<sup>2</sup> Centre for Environment, Energy and Natural Resource Governance (C-EENRG), University of Cambridge, Cambridge, UK

<sup>3</sup> Center for Development Research (ZEF), University of Bonn, Bonn, Germany

<sup>4</sup> Institute for Food and Resource Economics (ILR), University of Bonn, Bonn, Germany

<sup>5</sup> Department of Forestry and Environmental Resources, North Carolina State University, Raleigh, USA

<sup>6</sup> Department of Land Economy, University of Cambridge, Cambridge, UK

\*To whom correspondence should be addressed. Email: thales.west@scionresearch.com

### Projects excluded from sample

**Ecomapuá project (VCS-ID 1094).** We did not evaluate this project due to the lack of pre-project information for the construction of a synthetic control. Ecomapuá was certified in 2013 but allegedly started in 2002, years before the REDD+ negotiations gained momentum at the international level<sup>1</sup>. The project reported higher per-hectare stocks of forest carbon than other projects and adopted an unrealistic zero stock in the post-deforestation land-use class (Table S1), which combined maximize carbon offsets.

**Cikel project (VCS-ID 832) & Envira project (VCS-ID 1382).** We did not evaluate these projects because they make fundamentally different assumptions. Their baselines are defined by the amount of forest that can be legally cleared inside the project boundaries in accordance with the Brazilian Forest Code, and they seek to avoid that planned, legal deforestation.

**Fortaleza Ituxi project (VCS-ID 1654).** We did not evaluate this project because it was not certified by the time we initiated our analysis.

---

<sup>1</sup> Pedroni L, Dutschke M, Streck C, Porrúa ME (2009) Creating incentives for avoiding further deforestation: the nested approach. *Clim Policy* 9(2):207–220.

## **Deforestation in the projects implemented in protected areas**

Both Suruí and Rio Preto-Jacundá projects experienced substantial levels of forest loss due to fires. Graça et al. (2012) estimate that 4187 ha of forest from the Suruí territory was affected by fires during 2010–2011, equivalent to 1.7% of the indigenous land, whereas a report by IMAZON (Araújo et al., 2017) identified the Rio Preto-Jacundá reserve among the top 10 and 20 most deforested protected area in the Brazilian Amazon during 2012–2015 in proportional and absolute terms, respectively.

### References

Araújo et al. (2017) Unidades de conservação mais desmatadas da Amazônia Legal 2012–2015. (Belém, Brazil).

Graça PML de A, Vitel CSMN, Fearnside PM (2012) Forest fire scars detection using change-vector analysis in the Sete de Setembro indigenous land - Rondônia. *Rev Ambiente* 8:511–521.

## **Selection of deforestation data**

Deforestation data for the Brazilian Amazon are available from a number of well-known publicly available datasets. Some examples are PRODES, TerraClass, and MapBiomas. PRODES data result from the official deforestation monitoring program from Brazil's National Institute for Space Research (INPE). Unfortunately, PRODES data, initially available from 2000, underwent a new georectification process in the late 2000s due to incompatibility issues among images from different satellites. The revised version of the data, available in the form of a shapefile, now starts in 2007. We were unable to use the current PRODES data because they would significantly constrain the pretreatment period available for the construction of the synthetic controls.

In contrast, the MapBiomas data are annually available for 1985–2018, but due to a large number of mapped land-use classes (i.e., 6 main classes and 27 subclasses), MapBiomas accuracy is lower than TerraClass. In turn, TerraClass data (also produced by INPE) are not annually available, and therefore could not be used for an annual analysis such as ours. However, as illustrated in Abadie et al. (2003; 2011), covariate data do not need to be available on an annual basis for the construction of synthetic controls. In this study, we attempted to benefit from the higher mapping accuracy from the TerraClass data for the construction of our buffer covariates, while we relied on the MapBiomas data for the annual deforestation estimates.

## References

- Abadie A, Diamond A, Hainmueller J (2011) Synth: An R package for synthetic control methods in comparative case studies. *J Stat Softw* 42(13):1–17.
- Abadie A, Gardeazabal J (2003) The economic costs of conflict: A case study of the Basque country. *Am Econ Rev* 93(1):113–132

## Deforestation-data processing

Annual deforestation information for the 2001–2017 period was obtained from the Amazon biome land-use/cover (LUC) maps of *MapBiomas*<sup>2</sup> (v.3.1). Maps were resampled at the 250-meter resolution, following Brazil’s official deforestation-mapping system (PRODES), and reclassified based on the following land-cover classes: forest, non-forest, and water. We applied a series of spatiotemporal filters to (i) replace each cloud pixel with the pixel’s LUC class in the next observable year or mask them from the analysis when the pixel’s LUC class was unobserved throughout the study period, (ii) mask pixels that transitioned from forest to water (and vice-versa), (iii) mask forest pixels that transitioned to another class in one year, but transitioned back in the next, and (iv) non-forest pixels that transitioned to forest (because our study is focused on the avoided deforestation of mature forests).

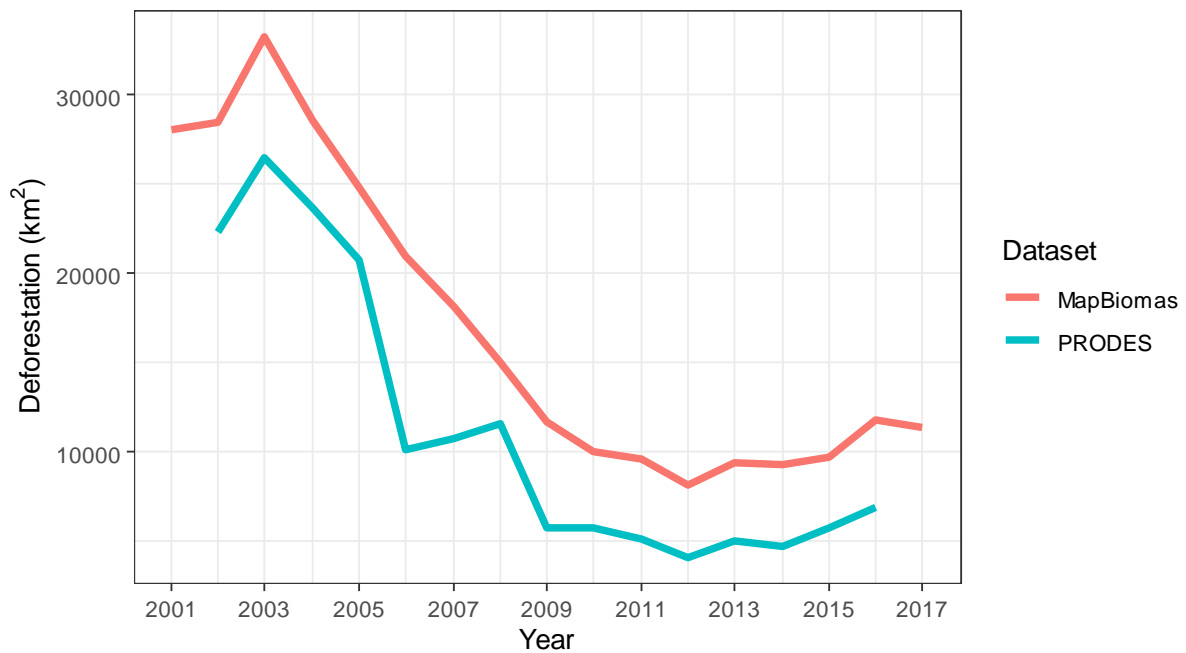

Figure S1. Deforestation in the Amazon biome: *MapBiomas* land-use/-cover dataset (v.3.1) versus PRODES municipality-level dataset (summing across all municipalities at least 50% inside the Amazon forest biome).

---

<sup>2</sup> <http://mapbiomas.org/>

## Standard methods for the construction of deforestation baseline for voluntary REDD+ projects

Standard deforestation baselines tend to assume the continuation of historical deforestation trends. The period for calculating historical deforestation rates is specified in the VCS-approved methodology adopted by the project proponents (all projects must follow an appropriate VCS-approved methodology). The general VCS rule, from the *VCS Agriculture, Forestry and Other Land Use (AFOLU) Requirements* (v.3.6), is:

*Methodologies shall set out criteria and procedures to identify where deforestation would likely occur using spatial analysis and projections [...] Such analysis shall be based on historical factors over at least the previous 10 years that explain past patterns and can be used to make future projections of deforestation.*

All projects evaluated in our study adopted either VCS's methodology VM0007 or VM0015 (Table S1). Both methodologies are rather similar when it comes to unplanned deforestation baseline development. In general, historical deforestation rates, from a *reference region* that usually encompasses the project area, are extrapolated into the future based on a linear (or non-linear) time trend. In some cases, where there is no clear trend present in the data (or for conservative purposes), the historical average is used (e.g., see the *Florestal Santa Maria* Project in Figure S5). It is also common for project proponents to employ existing land-use/cover change models available in the literature to forecast deforestation. Many of these models, e.g., *Dynamica EGO* (Soares-Filho et al., 2002) and *TerrSet/IDRISI* (West et al., 2020), employ Markov-chain, land-use transition matrices, which imply in an exponential-decay trend of annual deforestation rates (which can be somewhat observed in some of the projects from Figure S5).

The Suruí Project's baseline is an exception to the rule described above. In that case, baseline deforestation rates were informed by a community-specific, system dynamics model, the *SIMSURUI*, developed by Vitel et al. (2013) based on a participatory model development approach:

*The SIMSURUI model includes components that are specific to the Suruí socio-ecological system, including interactions among demography, economy and landscape. Land use reflects the strategic development of productive activities by different Suruí agent groups. Vegetation dynamics are inferred from these interactions. The systems model was coupled with a cellular automata model to spatially allocate the modeled deforestation rate.*

## References

Soares-Filho BS et al. (2002). DINAMICA—a stochastic cellular automata model designed to simulate the landscape dynamics in an Amazonian colonization frontier. *Ecol Modell* 154, 217–235

Vitel CSMN, et al. (2013) Land-use change modeling in a Brazilian indigenous reserve: Construction of a reference scenario for the Suruí REDD Project. *Hum Ecol* 41(6):807–826

West TAP et al. (2020) Comparison of spatial modelling frameworks for the identification of future afforestation in New Zealand. *Landsc Urban Plan* 198, 103780

## **Criteria for construction and selection of synthetic controls**

The construction of synthetic controls (SCs) is sensitive to the heterogeneity of donors. The following criteria were adopted to ensure impartial construction of the SCs:

1. *Donor location.* Donor pools preferably include only parcels in the same state as the REDD+ projects. Pools are expanded to parcels within the Amazon biome if the SC constructed from same-state donors failed to pass quality assessment due to unbalanced covariates.
2. *Quality assessment.* SCs are assessed based on two criteria: (1) pre-treatment cumulative and annual deforestation rates, expected to be within  $\pm 10\%$  the average pre-treatment rates observed in the REDD+ project area, and (2) SC area, expected to be within  $\pm 25\%$  the REDD+ project area.
3. *Size restrictions.* If the SC area criterion is not met, donor pools are restricted to donors with areas within  $\pm 25\%$  the REDD+ project area. If the area criterion remains unmet, the latter interval is expanded to  $\pm 50\%$  and the optimal SC with the lowest possible Mean Squared Prediction Error (MSPE) drawing on an Amazon-wide donor pool is selected independent of the quality assessment.

Table S1. Voluntary REDD+ projects.

| ID <sup>[1]</sup> | Project                      | State <sup>[2]</sup> | Carbon-accounting (baseline) methodology | Start year | Year of certification (i.e., validation) | Average annual baseline deforestation until 2017 (ha year <sup>-1</sup> ) | Cumulative baseline deforestation until 2017 (ha) | Forest carbon stock (CO <sub>2</sub> ha <sup>-1</sup> ) | Average post-deforestation carbon stock (CO <sub>2</sub> ha <sup>-1</sup> ) | Ex-ante net avoided carbon emissions until 2017 <sup>[3]</sup> (Mg CO <sub>2</sub> ) | Tradable carbon offsets issued by 2017 <sup>[1,4]</sup> (Mg CO <sub>2</sub> ) | Tradable carbon offsets issued as of September 2019 <sup>[1,4]</sup> (Mg CO <sub>2</sub> ) | Certified carbon offsets not yet issued for trading as of September 2019 <sup>[1]</sup> (Mg CO <sub>2</sub> ) |
|-------------------|------------------------------|----------------------|------------------------------------------|------------|------------------------------------------|---------------------------------------------------------------------------|---------------------------------------------------|---------------------------------------------------------|-----------------------------------------------------------------------------|--------------------------------------------------------------------------------------|-------------------------------------------------------------------------------|--------------------------------------------------------------------------------------------|---------------------------------------------------------------------------------------------------------------|
| 981               | <i>ADPML Portel-Para</i>     | PA                   | VM0015                                   | 2009       | 2013                                     | 537.2                                                                     | 4835                                              | 519.9                                                   | 51.6                                                                        | 2,147,616                                                                            | 82,000                                                                        | 167,000                                                                                    | 310,611                                                                                                       |
| 1686              | <i>Agrocortex</i>            | AC, AM               | VM0015                                   | 2014       | 2018                                     | 949.1                                                                     | 3796                                              | 619.5                                                   | 46.9                                                                        | 1,162,030                                                                            | 0                                                                             | 6550                                                                                       | 68,973                                                                                                        |
| 875               | <i>Florestal Santa Maria</i> | MT                   | VM0007                                   | 2009       | 2012                                     | 2038.9                                                                    | 18,350                                            | 563.3                                                   | 77.1                                                                        | 8,555,310                                                                            | 2,564,096                                                                     | 2,564,096                                                                                  | 8593                                                                                                          |
| 1115              | <i>Jari/Amapá</i>            | AP                   | VM0015                                   | 2011       | 2013                                     | 654.7                                                                     | 4583                                              | 566.0                                                   | 61.2                                                                        | 781,688                                                                              | 275,772                                                                       | 536,560                                                                                    | 0                                                                                                             |
| 1329              | <i>Maísa</i>                 | PA                   | VM0015                                   | 2012       | 2015                                     | 282.8                                                                     | 1697                                              | 453.1                                                   | 61.2                                                                        | 464,012                                                                              | 50,489                                                                        | 52,108                                                                                     | 0                                                                                                             |
| 1571              | <i>Manoa</i>                 | RO                   | VM0015                                   | 2013       | 2017                                     | 424.8                                                                     | 2124                                              | 513.0                                                   | 64.6                                                                        | 677,295                                                                              | 0                                                                             | 482,344                                                                                    | 0                                                                                                             |
| 963               | <i>Purus</i>                 | AC                   | VM0007                                   | 2011       | 2013                                     | 582.9                                                                     | 4080                                              | 512.9                                                   | 46.9                                                                        | 667,064                                                                              | 707,358                                                                       | 979,876                                                                                    | N/A                                                                                                           |
| 1503              | <i>Rio Preto-Jacundá</i>     | RO                   | VM0015                                   | 2012       | 2016                                     | 1222                                                                      | 6111                                              | 476.8                                                   | 61.2                                                                        | 1,999,626                                                                            | 654,406                                                                       | 1,063,434                                                                                  | 148,092                                                                                                       |
| 977               | <i>RMDLT Portel-Para</i>     | PA                   | VM0015                                   | 2008       | 2013                                     | 1237.3                                                                    | 12,373                                            | 519.9                                                   | 51.6                                                                        | 5,512,539                                                                            | 607,622                                                                       | 1,711,334                                                                                  | 1,562,406                                                                                                     |
| 1112              | <i>Russas</i>                | AC                   | VM0007                                   | 2011       | 2014                                     | 608.9                                                                     | 3653                                              | 411.0                                                   | 35.2                                                                        | 723,893                                                                              | 76,252                                                                        | 84,894                                                                                     | 217,733                                                                                                       |
| 1118              | <i>Suruí</i>                 | RO, MT               | VM0015                                   | 2009       | 2012                                     | 237.5                                                                     | 2137                                              | 633.9                                                   | 47.0                                                                        | 1,139,504                                                                            | 251,529                                                                       | 251,529                                                                                    | 0                                                                                                             |
| 1113              | <i>Valparaiso</i>            | AC                   | VM0007                                   | 2011       | 2014                                     | 798.1                                                                     | 4788                                              | 440.1                                                   | 35.2                                                                        | 1,023,826                                                                            | 97,528                                                                        | 114,192                                                                                    | 373,168                                                                                                       |
| Total             |                              |                      |                                          |            |                                          |                                                                           |                                                   |                                                         |                                                                             | 24,854,403                                                                           | 5,367,052                                                                     | 8,013,917                                                                                  | 2,689,576                                                                                                     |

<sup>[1]</sup> Obtained from the *Verified Carbon Standard* (VCS)'s project database.

<sup>[2]</sup> Acre (AC), Amapá (AP), Amazonas (AM), Mato Grosso (MT), Pará (PA), and Rondônia (RO).

<sup>[3]</sup> Ex-ante avoided net carbon emissions are calculated as the difference between baseline deforestation emissions minus ex-ante (planned) emissions from the REDD+ project. In some cases, there is also a small percentage deduction for assumed leakage emissions.

<sup>[4]</sup> Tradable offsets can differ from the ex-ante estimates for several reasons: (1) they depend on whether and when verification has occurred to certify net carbon emissions; (2) they are based on ex-post avoided net carbon emissions measurements; and (3) they are discounted by an “insurance” percentage allocated to the VCS's cross-project *pooled buffer account*.

Table S2. Reported versus calculated project area, and deforestation from start date to 2017.

| ID <sup>[1]</sup> | Project                      | Project area <sup>[2]</sup><br>(ha) | Polygon area <sup>[3,4]</sup><br>(ha) | Forest cover in the polygon at start date <sup>[5]</sup><br>(ha) | Start date | Cumulative deforestation in the polygon from start date to 2017<br>(ha) | Percent of forest cover in the polygon lost since start date (%) | Maximum deforestation possible outside project boundaries <sup>[6]</sup><br>(ha) |
|-------------------|------------------------------|-------------------------------------|---------------------------------------|------------------------------------------------------------------|------------|-------------------------------------------------------------------------|------------------------------------------------------------------|----------------------------------------------------------------------------------|
| 981               | <i>ADPML Portel-Para</i>     | 135,106                             | 149,147                               | 148,521                                                          | 2009       | 600                                                                     | 0.4                                                              | 13,415                                                                           |
| 1686              | <i>Agrocortex</i>            | 186,219                             | 186,369                               | 186,350                                                          | 2014       | 63                                                                      | <0.0                                                             | 131                                                                              |
| 875               | <i>Florestal Santa Maria</i> | 70,000                              | 71,662                                | 71,490                                                           | 2009       | 213                                                                     | 0.3                                                              | 1490                                                                             |
| 1115              | <i>Jari/Amapá</i>            | 65,980                              | 77,857                                | 76,557                                                           | 2011       | 3581                                                                    | 4.7                                                              | 10,577                                                                           |
| 1329              | <i>Maísa</i>                 | 28,752                              | 30,976                                | 29,495                                                           | 2012       | 131                                                                     | 0.4                                                              | 743                                                                              |
| 1571              | <i>Manoa</i>                 | 72,843                              | 72,899                                | 71,797                                                           | 2013       | 13                                                                      | <0.0                                                             | 0                                                                                |
| 963               | <i>Purus</i>                 | 34,702                              | 35,195                                | 34,931                                                           | 2011       | 500                                                                     | 1.4                                                              | 229                                                                              |
| 1503              | <i>Rio Preto-Jacundá</i>     | 94,289                              | 99,336                                | 99,038                                                           | 2012       | 3125                                                                    | 3.2                                                              | 4749                                                                             |
| 977               | <i>RMDLT Portel-Para</i>     | 177,900                             | 194,550                               | 193,985                                                          | 2008       | 694                                                                     | 0.4                                                              | 16,085                                                                           |
| 1112              | <i>Russas</i>                | 41,976                              | 42,519                                | 42,243                                                           | 2011       | 356                                                                     | 0.8                                                              | 267                                                                              |
| 1118              | <i>Suruí</i>                 | 247,796                             | 247,796                               | 244,525                                                          | 2009       | 5568                                                                    | 2.3                                                              | –                                                                                |
| 1113              | <i>Valparaiso</i>            | 28,096                              | 28,988                                | 28,669                                                           | 2011       | 575                                                                     | 2.0                                                              | 573                                                                              |

<sup>[1]</sup> Obtained from the *Verified Carbon Standard* (VCS)'s project database.

<sup>[2]</sup> Reported in the official project description documents.

<sup>[3]</sup> In the case of the Suruí project, the entire polygon (i.e., indigenous land) serves as the project's buffer zone for leakage assessment. This implies that all deforestation inside the indigenous land is linked to the project.

<sup>[4]</sup> Obtained from official project KML files (often the same as the polygon from the CAR database).

<sup>[5]</sup> Processed from the *MapBiomass* dataset (Fig. S1).

<sup>[6]</sup> Computed as *forest cover in the polygon at start date* (ha) minus *project area* (ha). Note that if there was more forest cover outside the Project Area than the area recorded as deforested, then it is theoretically possible that all of that deforestation occurred outside the official project boundaries.



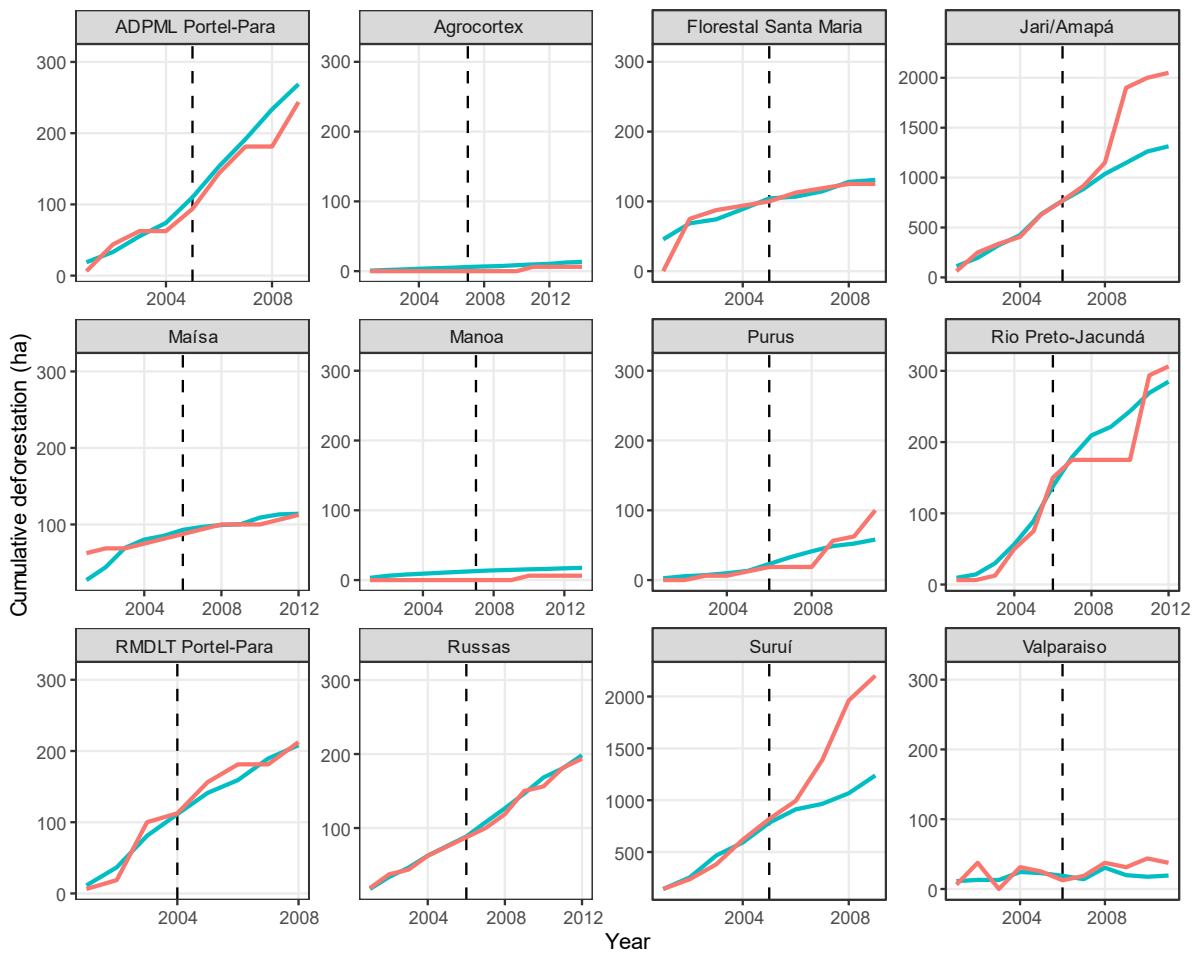

Figure S2. “Proof-of-concept” results from the synthetic control method. Pretreatment deforestation in areas with REDD+ projects (red) versus synthetic controls (blue). Dashed black lines separate “training” and “testing” periods.

Table S3. “Proof-of-concept” results from the synthetic control method. Pretreatment mean squared prediction errors (MSPEs) from the “training” and “testing” periods.

| <b>Project</b>                   | <b>Start year</b> | <b>Training period</b> | <b>Training MSPE</b> | <b>Testing period</b> | <b>Testing MSPE</b> | <b>Training/testing MSPE</b> |
|----------------------------------|-------------------|------------------------|----------------------|-----------------------|---------------------|------------------------------|
| <i>ADPML<br/>Portel-Para</i>     | 2009              | 2001–2005              | 143.8                | 2006–2009             | 887.1               | 6.2                          |
| <i>Agrocortex</i>                | 2014              | 2001–2007              | 14.1                 | 2008–2014             | 41.1                | 2.9                          |
| <i>Jari/Amapá</i>                | 2011              | 2001–2006              | 686.0                | 2007–2011             | 407,000             | 593.3                        |
| <i>Maísa</i>                     | 2012              | 2001–2006              | 318.9                | 2007–2012             | 23.3                | 0.1                          |
| <i>Manoa</i>                     | 2013              | 2001–2007              | 86.6                 | 2008–2013             | 137.2               | 1.6                          |
| <i>Purus</i>                     | 2011              | 2001–2006              | 11.6                 | 2007–2011             | 524.1               | 45.2                         |
| <i>Rio Preto-<br/>Jacundá</i>    | 2012              | 2001–2006              | 127.4                | 2007–2012             | 1513.7              | 11.9                         |
| <i>RMDLT<br/>Portel-Para</i>     | 2008              | 2001–2004              | 177.2                | 2005–2008             | 201.1               | 1.1                          |
| <i>Russas</i>                    | 2012              | 2001–2006              | 3.8                  | 2007–2012             | 50.3                | 13.2                         |
| <i>Florestal<br/>Santa Maria</i> | 2009              | 2001–2005              | 466.4                | 2006–2009             | 23.4                | 0.1                          |
| <i>Suruí</i>                     | 2009              | 2001–2005              | 2035.8               | 2006–2009             | 463,179             | 227.5                        |
| <i>Valparaiso</i>                | 2012              | 2001–2006              | 147.1                | 2007–2012             | 244.6               | 1.7                          |

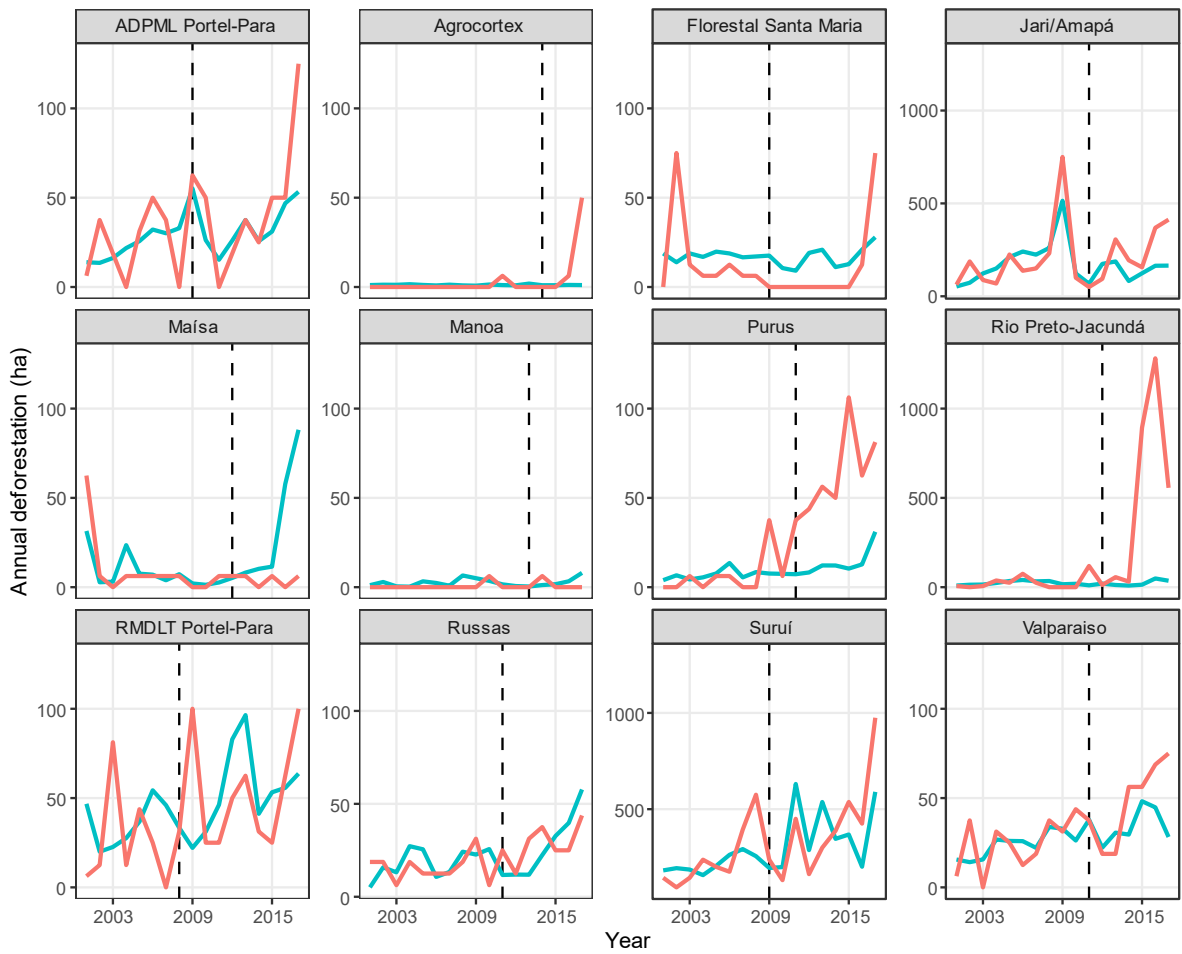

Figure S3. Annual post-2000 deforestation in Amazonian areas with REDD+ projects (red) versus synthetic controls (blue). Dashed black lines are the project start dates.

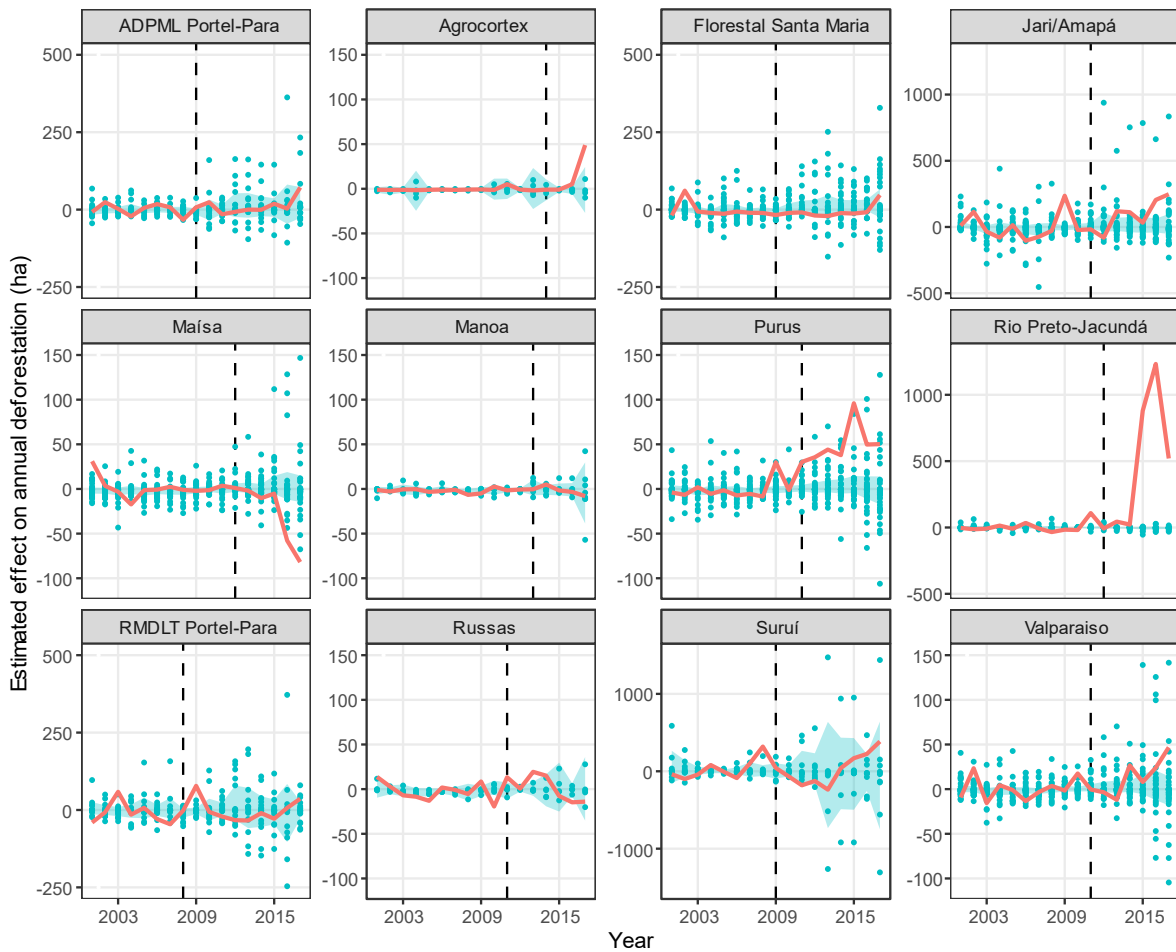

Figure S4. Placebo tests: annual deforestation in REDD+ project areas minus deforestation in their respective synthetic controls (red), and placebos minus their respective synthetic controls (blue dots). Dashed black lines are the project start dates (assumed the same for placebos). Shaded blue areas represent 99% confidence intervals around the mean of the placebos. The number of placebos varies by project based on whether synthetic controls with low mean squared prediction error could be constructed for the placebo tests.

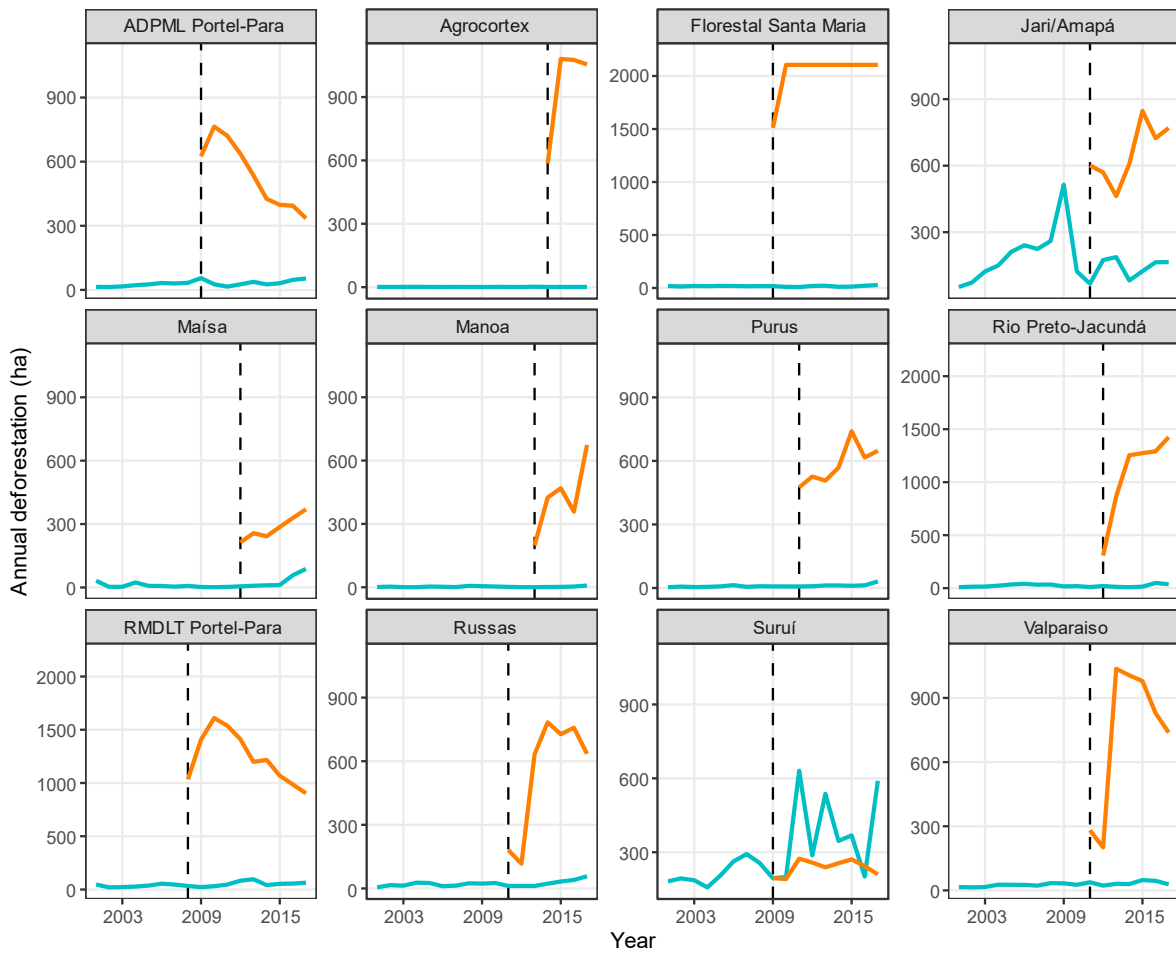

Figure S5. Annual deforestation from the baseline scenarios adopted by the REDD+ projects (orange) versus observed annual deforestation in the synthetic controls (blue). Dashed black lines are the project start dates.

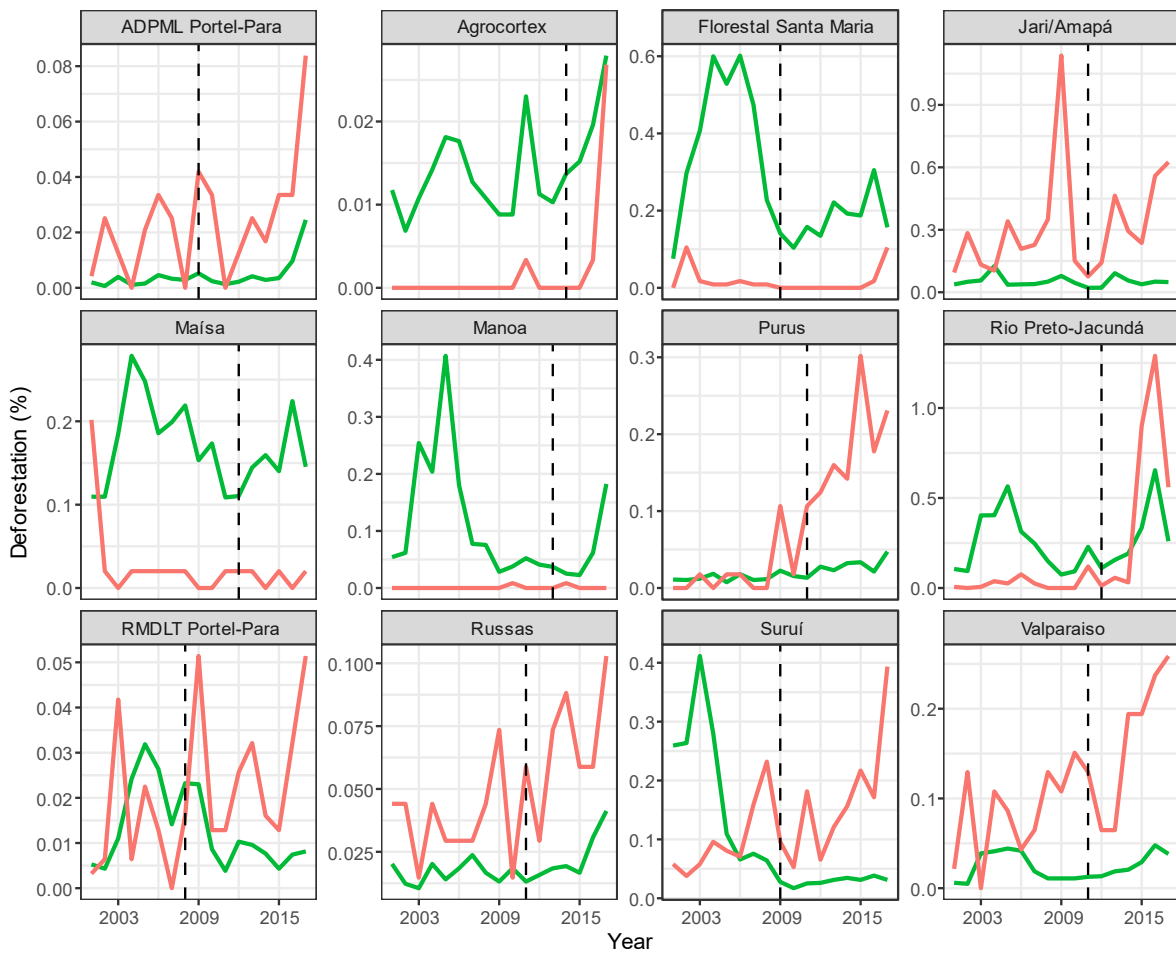

Figure S6. Annual deforestation (proportional to area) in REDD+ project areas (red) and 10-km buffer zones around the projects (green). Dashed black lines are the project start dates.

Table S4. Maps used for the creation of spatial covariates.

| Map                          | Description                                                                                                                                    | Source                                                                                               |
|------------------------------|------------------------------------------------------------------------------------------------------------------------------------------------|------------------------------------------------------------------------------------------------------|
| Distance from state capitals | Euclidean-distance map from state capitals in Brazil                                                                                           | Brazilian Institute of Geography and Statistics (IBGE; available for download <a href="#">here</a> ) |
| Distance from urban centers  | Euclidean-distance map from townhalls with government agency offices.                                                                          | Brazilian Institute of Geography and Statistics (IBGE; available for download <a href="#">here</a> ) |
| Distance from highways       | Euclidean-distance map from federal and state highways.                                                                                        | Ministry of Infrastructure (available for download <a href="#">here</a> )                            |
| Distance from roads          | Euclidean-distance map from regional roads.                                                                                                    | Brazilian Institute of Geography and Statistics (IBGE; available for download <a href="#">here</a> ) |
| Slope                        | Continuous slope map (degrees) on a mosaic of the Shuttle Radar Topography Mission (SRTM) 1 Arc-Second Global, Digital Elevation Maps (meters) | United States Geological Survey (USGS; available for download <a href="#">here</a> )                 |
| Soil quality                 | Ordinal map that indicates soil agricultural potential, from poor quality (i.e., 0) to excellent quality (i.e., 4).                            | Brazilian Institute of Geography and Statistics (IBGE; available for download <a href="#">here</a> ) |

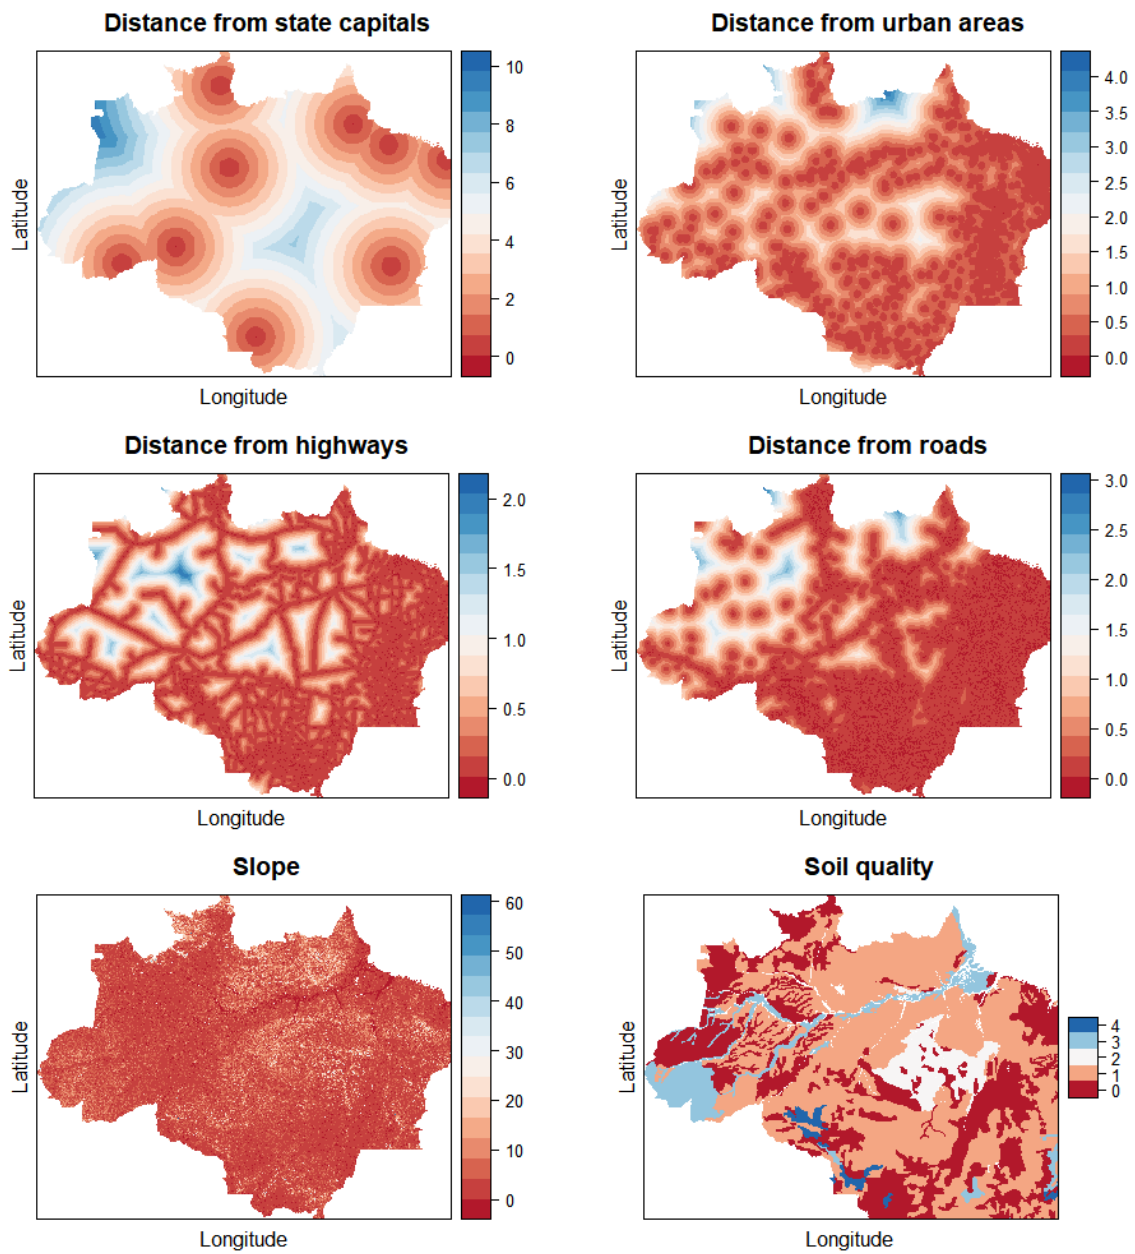

Figure S7. Maps used for the creation of spatial covariates.



## Annex 1. Cumulative deforestation analyses: covariate balance between the REDD+ polygons and synthetic controls for the period from 2001 to project start year

Table A1-1. REDD+ project: *ADPML Portel-Para REDD Project*

| Variable                                               | Project | Synthetic control* | Donor-pool mean |
|--------------------------------------------------------|---------|--------------------|-----------------|
| Area (ha)                                              | 149,147 | 116,186            | 116,644         |
| Initial forest cover (%)                               | 99.58   | 99.72              | 97.99           |
| Euclidean distance to state capital                    | 2.222   | 2.047              | 3.207           |
| Euclidean distance to highways                         | 0.504   | 0.273              | 0.242           |
| Average slope                                          | 4.036   | 5.432              | 5.032           |
| Average soil quality                                   | 2.000   | 2.221              | 2.474           |
| Euclidean distance to urban areas                      | 0.496   | 0.507              | 0.605           |
| Euclidean distance to roads                            | 0.277   | 0.307              | 0.276           |
| Average cumulative deforestation (ha)                  | 113.194 | 115.058            | 1244.349        |
| Average annual deforestation (ha)                      | 27.083  | 26.154             | 266.715         |
| Proportion of primary forests in the buffer zone (%)   | 83.8    | 93.7               | 86.2            |
| Proportion of secondary forests in the buffer zone (%) | 1.8     | 1.4                | 2.8             |
| Proportion of pastures in the buffer zone (%)          | 0.8     | 1.2                | 4.6             |
| Proportion of agriculture in the buffer zone (%)       | 0.0     | 0.0                | 0.0             |
| Proportion of urban areas in the buffer zone (%)       | 0.0     | 0.0                | 0.0             |
| Mean squared prediction error (Loss V)                 | –       | 153.452            | –               |

\*Based on eight synthetic-control donors, five from Pará state, two from Amazonas state, and one from Mato Grosso state.

Table A1-2. REDD+ project: *Agrocortex REDD Project*

| Variable                                               | Project | Synthetic control* | Donor-pool mean |
|--------------------------------------------------------|---------|--------------------|-----------------|
| Area (ha)                                              | 186,369 | 114,338            | 135,140         |
| Initial forest cover (%)                               | 99.99   | 99.98              | 98.63           |
| Euclidean distance to state capital                    | 1.975   | 4.224              | 3.357           |
| Euclidean distance to highways                         | 0.437   | 0.387              | 0.23            |
| Average slope                                          | 4.800   | 4.521              | 4.693           |
| Average soil quality                                   | 3.898   | 3.611              | 2.795           |
| Euclidean distance to urban areas                      | 0.450   | 0.42               | 0.638           |
| Euclidean distance to roads                            | 0.373   | 0.444              | 0.303           |
| Average cumulative deforestation (ha)                  | 1.786   | 5.49               | 1461.748        |
| Average annual deforestation (ha)                      | 0.446   | 0.769              | 177.397         |
| Proportion of primary forests in the buffer zone (%)   | 98.2    | 97.6               | 89              |
| Proportion of secondary forests in the buffer zone (%) | 0.4     | 0.4                | 2.6             |
| Proportion of pastures in the buffer zone (%)          | 0.9     | 0.2                | 3.4             |
| Proportion of agriculture in the buffer zone (%)       | 0.0     | 0.0                | 0.0             |
| Proportion of urban areas in the buffer zone (%)       | 0.0     | 0.0                | 0.0             |
| Mean squared prediction error (Loss V)                 | –       | 16.768             | –               |

\*Based on six synthetic-control donors, two from Acre state and three from Amazonas state, and one from Pará state.

Table A1-3. REDD+ project: *Florestal Santa Maria Project (FSM)*

| Variable                                               | Project | Synthetic control* | Donor-pool mean |
|--------------------------------------------------------|---------|--------------------|-----------------|
| Area (ha)                                              | 71,662  | 64,901             | 55,940          |
| Initial forest cover (%)                               | 99.76   | 99.57              | 97.81           |
| Euclidean distance to state capital                    | 4.663   | 3.083              | 3.223           |
| Euclidean distance to highways                         | 0.155   | 0.131              | 0.245           |
| Average slope                                          | 5.115   | 4.405              | 5.557           |
| Average soil quality                                   | 2.000   | 2.001              | 2.440           |
| Euclidean distance to urban areas                      | 0.346   | 0.650              | 0.614           |
| Euclidean distance to roads                            | 0.040   | 0.240              | 0.202           |
| Average cumulative deforestation (ha)                  | 93.056  | 93.345             | 1952.358        |
| Average annual deforestation (ha)                      | 13.889  | 15.613             | 425.723         |
| Proportion of primary forests in the buffer zone (%)   | 82.6    | 83.0               | 82.1            |
| Proportion of secondary forests in the buffer zone (%) | 1.4     | 4.6                | 3.0             |
| Proportion of pastures in the buffer zone (%)          | 10.1    | 10.0               | 6.7             |
| Proportion of agriculture in the buffer zone (%)       | 0.0     | 0.4                | 0.7             |
| Proportion of urban areas in the buffer zone (%)       | 0.0     | 0.0                | 0.0             |
| Mean squared prediction error (Loss V)                 | –       | 322.745            | –               |

\*Based on four synthetic-control donors, one from Amazonas state, one from Mato Grosso state, and two from Pará state.

Table A1-4. REDD+ project: *Jari/Amapá REDD+ Project*

| Variable                                               | Project | Synthetic control* | Donor-pool mean |
|--------------------------------------------------------|---------|--------------------|-----------------|
| Area (ha)                                              | 77,857  | 73,950             | 75,533          |
| Initial forest cover (%)                               | 98.33   | 99.11              | 97.21           |
| Euclidean distance to state capital                    | 1.544   | 2.397              | 2.787           |
| Euclidean distance to highways                         | 0.059   | 0.227              | 0.255           |
| Average slope                                          | 8.422   | 8.401              | 5.970           |
| Average soil quality                                   | 2.000   | 2.007              | 2.291           |
| Euclidean distance to urban areas                      | 0.231   | 0.446              | 0.562           |
| Euclidean distance to roads                            | 0.055   | 0.32               | 0.274           |
| Average cumulative deforestation (ha)                  | 952.273 | 954.89             | 1458.452        |
| Average annual deforestation (ha)                      | 186.364 | 184.881            | 251.243         |
| Proportion of primary forests in the buffer zone (%)   | 75.5    | 81.8               | 84.4            |
| Proportion of secondary forests in the buffer zone (%) | 4.0     | 5.5                | 3.1             |
| Proportion of pastures in the buffer zone (%)          | 2.1     | 2.5                | 4.8             |
| Proportion of agriculture in the buffer zone (%)       | 0.0     | 0.0                | 0.3             |
| Proportion of urban areas in the buffer zone (%)       | 0.2     | 0.0                | 0.0             |
| Mean squared prediction error (Loss V)                 | –       | 6505.548           | –               |

\*Based on nine synthetic-control donors, two from Pará state, two from Mato Grosso state, three from Acre state, and two from Amazonas state.

Table A1-5. REDD+ project: *Maísa REDD+ Project*

| Variable                                               | Project | Synthetic control* | Donor-pool mean |
|--------------------------------------------------------|---------|--------------------|-----------------|
| Area (ha)                                              | 30,976  | 28,992             | 31,502          |
| Initial forest cover (%)                               | 95.22   | 98.03              | 98.64           |
| Euclidean distance to state capital                    | 1.993   | 2.110              | 3.083           |
| Euclidean distance to highways                         | 0.188   | 0.168              | 0.259           |
| Average slope                                          | 3.704   | 3.914              | 5.262           |
| Average soil quality                                   | 2.000   | 1.962              | 2.473           |
| Euclidean distance to urban areas                      | 0.486   | 0.718              | 0.634           |
| Euclidean distance to roads                            | 0.021   | 0.046              | 0.218           |
| Average cumulative deforestation (ha)                  | 88.021  | 87.159             | 1046.79         |
| Average annual deforestation (ha)                      | 9.375   | 9.614              | 145.417         |
| Proportion of primary forests in the buffer zone (%)   | 75.2    | 79.0               | 85.6            |
| Proportion of secondary forests in the buffer zone (%) | 8.1     | 5.9                | 2.4             |
| Proportion of pastures in the buffer zone (%)          | 11.8    | 11.9               | 7.0             |
| Proportion of agriculture in the buffer zone (%)       | 0.0     | 0.5                | 1.0             |
| Proportion of urban areas in the buffer zone (%)       | 0.0     | 0.0                | 0.0             |
| Mean squared prediction error (Loss V)                 | –       | 171.922            | –               |

\*Based on five synthetic-control donors, one from Amazonas state, two from Acre state, two one from Pará state.

Table A1-6. REDD+ project: *Manoia REDD+ Project*

| Variable                                               | Project | Synthetic control* | Donor-pool mean |
|--------------------------------------------------------|---------|--------------------|-----------------|
| Area (ha)                                              | 72,899  | 73,271             | 70,370          |
| Initial forest cover (%)                               | 99.86   | 99.72              | 97.67           |
| Euclidean distance to state capital                    | 1.213   | 2.590              | 2.815           |
| Euclidean distance to highways                         | 0.238   | 0.260              | 0.276           |
| Average slope                                          | 4.096   | 5.748              | 5.679           |
| Average soil quality                                   | 2.000   | 2.355              | 2.450           |
| Euclidean distance to urban areas                      | 0.501   | 0.656              | 0.622           |
| Euclidean distance to roads                            | 0.146   | 0.575              | 0.296           |
| Average cumulative deforestation (ha)                  | 1.923   | 7.791              | 1326.224        |
| Average annual deforestation (ha)                      | 0.481   | 0.970              | 185.468         |
| Proportion of primary forests in the buffer zone (%)   | 93.4    | 97.3               | 85.6            |
| Proportion of secondary forests in the buffer zone (%) | 1.0     | 0.3                | 2.6             |
| Proportion of pastures in the buffer zone (%)          | 4.7     | 0.1                | 4.5             |
| Proportion of agriculture in the buffer zone (%)       | 0.0     | 0.0                | 0.4             |
| Proportion of urban areas in the buffer zone (%)       | 0.0     | 0.0                | 0.0             |
| Mean squared prediction error (Loss V)                 | –       | 40.597             | –               |

\*Based on nine synthetic-control donors, one from Mato Grosso state, one from Acre state, four from Amazonas state, and three from Pará state.

Table A1-7. REDD+ project: *The Purus Project*

| Variable                                               | Project | Synthetic control* | Donor-pool mean |
|--------------------------------------------------------|---------|--------------------|-----------------|
| Area (ha)                                              | 35,194  | 28,331             | 30,639          |
| Initial forest cover (%)                               | 99.25   | 99.63              | 99.21           |
| Euclidean distance to state capital                    | 1.956   | 2.849              | 2.576           |
| Euclidean distance to highways                         | 0.190   | 0.129              | 0.137           |
| Average slope                                          | 5.202   | 5.323              | 5.611           |
| Average soil quality                                   | 4.000   | 3.887              | 3.667           |
| Euclidean distance to urban areas                      | 0.303   | 0.328              | 0.525           |
| Euclidean distance to roads                            | 0.176   | 0.245              | 0.273           |
| Average cumulative deforestation (ha)                  | 27.273  | 33.753             | 101.705         |
| Average annual deforestation (ha)                      | 9.091   | 6.419              | 19.271          |
| Proportion of primary forests in the buffer zone (%)   | 98.2    | 93.9               | 95.1            |
| Proportion of secondary forests in the buffer zone (%) | 0.3     | 2.8                | 1.9             |
| Proportion of pastures in the buffer zone (%)          | 0.7     | 2.5                | 2.4             |
| Proportion of agriculture in the buffer zone (%)       | 0.0     | 0.0                | 0.0             |
| Proportion of urban areas in the buffer zone (%)       | 0.0     | 0.0                | 0.0             |
| Mean squared prediction error (Loss V)                 | –       | 215.954            | –               |

\*Based on four synthetic-control donors from Acre state.

Table A1-8. REDD+ project: *Resex Rio Preto-Jacundá REDD+ Project*

| Variable                                               | Project | Synthetic control* | Donor-pool mean |
|--------------------------------------------------------|---------|--------------------|-----------------|
| Area (ha)                                              | 99,336  | 94,986             | 115,265         |
| Initial forest cover (%)                               | 99.70   | 96.493             | 94.877          |
| Euclidean distance to state capital                    | 1.644   | 3.188              | 3.169           |
| Euclidean distance to highways                         | 0.059   | 0.154              | 0.164           |
| Average slope                                          | 3.657   | 3.791              | 3.363           |
| Average soil quality                                   | 2.000   | 1.729              | 1.884           |
| Euclidean distance to urban areas                      | 0.519   | 0.818              | 0.824           |
| Euclidean distance to roads                            | 0.113   | 0.192              | 0.279           |
| Average cumulative deforestation (ha)                  | 133.333 | 138.734            | 178.542         |
| Average annual deforestation (ha)                      | 25.521  | 22.809             | 27.833          |
| Proportion of primary forests in the buffer zone (%)   | 84.1    | 65.1               | 73.1            |
| Proportion of secondary forests in the buffer zone (%) | 2.5     | 1.0                | 1.8             |
| Proportion of pastures in the buffer zone (%)          | 9.9     | 2.2                | 5.8             |
| Proportion of agriculture in the buffer zone (%)       | 0.0     | 0.0                | 0.0             |
| Proportion of urban areas in the buffer zone (%)       | 0.0     | 0.0                | 0.0             |
| Mean squared prediction error (Loss V)                 | –       | 888.765            | –               |

\*Based on two synthetic-control donors from sustainable-use reserves.

Table A1-9. REDD+ project: *RMDLT Portel-Para REDD Project*

| Variable                                               | Project | Synthetic control* | Donor-pool mean |
|--------------------------------------------------------|---------|--------------------|-----------------|
| Area (ha)                                              | 194,550 | 183,877            | 162,053         |
| Initial forest cover (%)                               | 99.71   | 99.41              | 98.896          |
| Euclidean distance to state capital                    | 2.553   | 3.434              | 3.434           |
| Euclidean distance to highways                         | 0.298   | 0.272              | 0.206           |
| Average slope                                          | 4.683   | 6.027              | 5.065           |
| Average soil quality                                   | 2.000   | 3.990              | 3.278           |
| Euclidean distance to urban areas                      | 0.636   | 0.559              | 0.636           |
| Euclidean distance to roads                            | 0.129   | 0.430              | 0.225           |
| Average cumulative deforestation (ha)                  | 121.094 | 127.782            | 1399.609        |
| Average annual deforestation (ha)                      | 26.562  | 30.847             | 315.938         |
| Proportion of primary forests in the buffer zone (%)   | 94.3    | 97.2               | 92.1            |
| Proportion of secondary forests in the buffer zone (%) | 1.4     | 1.1                | 2.4             |
| Proportion of pastures in the buffer zone (%)          | 0.7     | 0.8                | 3.0             |
| Proportion of agriculture in the buffer zone (%)       | 0.0     | 0.0                | 0.0             |
| Proportion of urban areas in the buffer zone (%)       | 0.0     | 0.0                | 0.0             |
| Mean squared prediction error (Loss V)                 | –       | 996.405            | –               |

\*Based on six synthetic-control donors, one from Pará state, two from Amazonas state, and three from Acre state.

Table A1-10. REDD+ project: *The Russas Project*

| Variable                                               | Project | Synthetic control* | Donor-pool mean |
|--------------------------------------------------------|---------|--------------------|-----------------|
| Area (ha)                                              | 42,519  | 38,853             | 41,637          |
| Initial forest cover (%)                               | 99.35   | 99.24              | 99.22           |
| Euclidean distance to state capital                    | 5.128   | 3.541              | 2.759           |
| Euclidean distance to highways                         | 0.044   | 0.135              | 0.148           |
| Average slope                                          | 3.533   | 5.974              | 5.934           |
| Average soil quality                                   | 2.730   | 3.955              | 3.479           |
| Euclidean distance to urban areas                      | 0.174   | 0.355              | 0.481           |
| Euclidean distance to roads                            | 0.174   | 0.244              | 0.276           |
| Average cumulative deforestation (ha)                  | 102.083 | 98.993             | 216.732         |
| Average annual deforestation (ha)                      | 16.146  | 15.893             | 35.677          |
| Proportion of primary forests in the buffer zone (%)   | 94.9    | 93.4               | 93.2            |
| Proportion of secondary forests in the buffer zone (%) | 2.8     | 2.3                | 2.1             |
| Proportion of pastures in the buffer zone (%)          | 1.9     | 3.8                | 4.2             |
| Proportion of agriculture in the buffer zone (%)       | 0.0     | 0.0                | 0.0             |
| Proportion of urban areas in the buffer zone (%)       | 0.0     | 0.0                | 0.0             |
| Mean squared prediction error (Loss V)                 | –       | 72.338             | –               |

\*Based on three synthetic-control donors from Acre state.

Table A1-11. REDD+ project: *Suruí Forest Carbon Project*

| Variable                                               | Project | Synthetic control* | Donor-pool mean |
|--------------------------------------------------------|---------|--------------------|-----------------|
| Area (ha)                                              | 247,796 | 250,867            | 218,195         |
| Initial forest cover (%)                               | 98.68   | 98.58              | 98.57           |
| Euclidean distance to state capital                    | 3.493   | 3.875              | 3.459           |
| Euclidean distance to highways                         | 0.193   | 0.275              | 0.319           |
| Average slope                                          | 5.809   | 5.838              | 4.714           |
| Average soil quality                                   | 4.359   | 1.912              | 2.106           |
| Euclidean distance to urban areas                      | 0.314   | 0.636              | 0.603           |
| Euclidean distance to roads                            | 0.097   | 0.133              | 0.193           |
| Average cumulative deforestation (ha)                  | 971.528 | 1022.954           | 853.725         |
| Average annual deforestation (ha)                      | 244.444 | 215.119            | 171.086         |
| Proportion of primary forests in the buffer zone (%)   | 44.8    | 60.7               | 71.3            |
| Proportion of secondary forests in the buffer zone (%) | 7.8     | 5.3                | 3.7             |
| Proportion of pastures in the buffer zone (%)          | 46.4    | 29.6               | 19.0            |
| Proportion of agriculture in the buffer zone (%)       | 0.0     | 0.0                | 0.0             |
| Proportion of urban areas in the buffer zone (%)       | 0.0     | 0.0                | 0.0             |
| Mean squared prediction error (Loss V)                 | –       | 29,106.07          | –               |

\*Based on 11 synthetic-control donors from indigenous lands.

Table A1-12. REDD+ project: *The Valparaiso Project*

| Variable                                               | Project | Synthetic control* | Donor-pool mean |
|--------------------------------------------------------|---------|--------------------|-----------------|
| Area (ha)                                              | 28,988  | 29,906             | 29,700          |
| Initial forest cover (%)                               | 98.90   | 99.32              | 99.11           |
| Euclidean distance to state capital                    | 5.050   | 2.074              | 2.69            |
| Euclidean distance to highways                         | 0.124   | 0.138              | 0.136           |
| Average slope                                          | 3.621   | 5.140              | 5.874           |
| Average soil quality                                   | 3.243   | 3.299              | 3.733           |
| Euclidean distance to urban areas                      | 0.297   | 0.421              | 0.581           |
| Euclidean distance to roads                            | 0.181   | 0.245              | 0.311           |
| Average cumulative deforestation (ha)                  | 142.188 | 127.974            | 108.295         |
| Average annual deforestation (ha)                      |         | 25.692             | 20.076          |
| Proportion of primary forests in the buffer zone (%)   | 97.0    | 95.5               | 95.6            |
| Proportion of secondary forests in the buffer zone (%) | 1.7     | 1.9                | 1.9             |
| Proportion of pastures in the buffer zone (%)          | 1.0     | 2.1                | 2.1             |
| Proportion of agriculture in the buffer zone (%)       | 0.0     | 0.0                | 0.0             |
| Proportion of urban areas in the buffer zone (%)       | 0.0     | 0.0                | 0.0             |
| Mean squared prediction error (Loss V)                 | –       | 56.164             | –               |

\*Based on five synthetic-control donors from Acre state.

## Annex 2. Annual deforestation analyses: covariate balance between the REDD+ polygons and synthetic controls for the period from 2001 to project start year

Table A2-1. REDD+ project: *ADPML Portel-Para REDD Project*

| Variable                                               | Project | Synthetic control* | Donor-pool mean |
|--------------------------------------------------------|---------|--------------------|-----------------|
| Area (ha)                                              | 149,147 | 99,167             | 116,644         |
| Initial forest cover (%)                               | 99.58   | 99.72              | 97.99           |
| Euclidean distance to state capital                    | 2.222   | 2.705              | 3.207           |
| Euclidean distance to highways                         | 0.504   | 0.48               | 0.242           |
| Average slope                                          | 4.036   | 6.406              | 5.032           |
| Average soil quality                                   | 2.000   | 2.597              | 2.474           |
| Euclidean distance to urban areas                      | 0.496   | 0.542              | 0.605           |
| Euclidean distance to roads                            | 0.277   | 0.288              | 0.276           |
| Average cumulative deforestation (ha)                  | 113.194 | 105.051            | 1244.349        |
| Average annual deforestation (ha)                      | 27.083  | 26.824             | 266.715         |
| Proportion of primary forests in the buffer zone (%)   | 83.8    | 89.9               | 86.2            |
| Proportion of secondary forests in the buffer zone (%) | 1.8     | 1.8                | 2.8             |
| Proportion of pastures in the buffer zone (%)          | 0.1     | 1.3                | 4.6             |
| Proportion of agriculture in the buffer zone (%)       | 0.0     | 0.0                | 0.0             |
| Proportion of urban areas in the buffer zone (%)       | 0.0     | 0.0                | 0.0             |
| Mean squared prediction error (Loss V)                 | –       | 295.161            | –               |

\*Based on 12 synthetic-control donors, four from Pará state, two from Acre state, and six from Amazonas state.

Table A2-2. REDD+ project: *Agrocortex REDD Project*

| Variable                                               | Project | Synthetic control* | Donor-pool mean |
|--------------------------------------------------------|---------|--------------------|-----------------|
| Area (ha)                                              | 186,369 | 115,623            | 135,140         |
| Initial forest cover (%)                               | 99.99   | 99.98              | 98.63           |
| Euclidean distance to state capital                    | 1.975   | 4.212              | 3.357           |
| Euclidean distance to highways                         | 0.437   | 0.41               | 0.23            |
| Average slope                                          | 4.800   | 4.755              | 4.693           |
| Average soil quality                                   | 3.898   | 3.848              | 2.795           |
| Euclidean distance to urban areas                      | 0.450   | 0.410              | 0.638           |
| Euclidean distance to roads                            | 0.373   | 0.359              | 0.303           |
| Average cumulative deforestation (ha)                  | 1.786   | 8.758              | 1461.748        |
| Average annual deforestation (ha)                      | 0.446   | 1.166              | 177.397         |
| Proportion of primary forests in the buffer zone (%)   | 98.2    | 97.7               | 89.0            |
| Proportion of secondary forests in the buffer zone (%) | 0.4     | 0.5                | 2.6             |
| Proportion of pastures in the buffer zone (%)          | 0.9     | 0.2                | 3.4             |
| Proportion of agriculture in the buffer zone (%)       | 0.0     | 0.0                | 0.0             |
| Proportion of urban areas in the buffer zone (%)       | 0.0     | 0.0                | 0.0             |
| Mean squared prediction error (Loss V)                 | –       | 6.832              | –               |

\*Based on 13 synthetic-control donors, four from Acre state, two from Mato Grosso state, five from Amazonas state, and two from Pará state.

Table A2-3. REDD+ project: *Florestal Santa Maria Project (FSM)*

| Variable                                               | Project | Synthetic control* | Donor-pool mean |
|--------------------------------------------------------|---------|--------------------|-----------------|
| Area (ha)                                              | 71,662  | 72,504             | 77,054          |
| Initial forest cover (%)                               | 99.76   | 99.29              | 97.89           |
| Euclidean distance to state capital                    | 4.663   | 2.220              | 2.892           |
| Euclidean distance to highways                         | 0.155   | 0.315              | 0.250           |
| Average slope                                          | 5.115   | 5.800              | 5.267           |
| Average soil quality                                   | 2.000   | 2.071              | 2.286           |
| Euclidean distance to urban areas                      | 0.346   | 0.663              | 0.644           |
| Euclidean distance to roads                            | 0.040   | 0.290              | 0.328           |
| Average cumulative deforestation (ha)                  | 93.056  | 87.595             | 943.310         |
| Average annual deforestation (ha)                      | 13.889  | 17.573             | 207.639         |
| Proportion of primary forests in the buffer zone (%)   | 86.0    | 89.9               | 85.6            |
| Proportion of secondary forests in the buffer zone (%) | 1.4     | 1.9                | 2.7             |
| Proportion of pastures in the buffer zone (%)          | 10.1    | 1.3                | 4.2             |
| Proportion of agriculture in the buffer zone (%)       | 0.0     | 0.0                | 0.2             |
| Proportion of urban areas in the buffer zone (%)       | 0.0     | 0.0                | 0.0             |
| Mean squared prediction error (Loss V)                 | –       | 555.622            | –               |

\*Based on 18 synthetic-control donors, one from Acre state, seven from Pará state, seven from Amazonas state, and three from Mato Grosso state.

Table A2-4. REDD+ project: *Jari/Amapá REDD+ Project*

| Variable                                               | Project | Synthetic control* | Donor-pool mean |
|--------------------------------------------------------|---------|--------------------|-----------------|
| Area (ha)                                              | 77,857  | 76,081             | 75,533          |
| Initial forest cover (%)                               | 98.33   | 98.89              | 97.21           |
| Euclidean distance to state capital                    | 1.544   | 2.155              | 2.787           |
| Euclidean distance to highways                         | 0.059   | 0.289              | 0.255           |
| Average slope                                          | 8.422   | 8.369              | 5.97            |
| Average soil quality                                   | 2.000   | 2.000              | 2.291           |
| Euclidean distance to urban areas                      | 0.231   | 0.447              | 0.562           |
| Euclidean distance to roads                            | 0.055   | 0.116              | 0.274           |
| Average cumulative deforestation (ha)                  | 952.273 | 959.812            | 1458.452        |
| Average annual deforestation (ha)                      | 186.364 | 185.472            | 251.243         |
| Proportion of primary forests in the buffer zone (%)   | 75.5    | 77.4               | 84.4            |
| Proportion of secondary forests in the buffer zone (%) | 4.0     | 4.4                | 3.1             |
| Proportion of pastures in the buffer zone (%)          | 2.1     | 3.3                | 4.8             |
| Proportion of agriculture in the buffer zone (%)       | 0.0     | 0.0                | 0.3             |
| Proportion of urban areas in the buffer zone (%)       | 0.2     | 0.0                | 0.0             |
| Mean squared prediction error (Loss V)                 | –       | 8609.226           | –               |

\*Based on four synthetic-control donors, two Amazonas state and two from Acre state.



Table A2-5. REDD+ project: *Maísa REDD+ Project*

| Variable                                               | Project | Synthetic control* | Donor-pool mean |
|--------------------------------------------------------|---------|--------------------|-----------------|
| Area (ha)                                              | 30,976  | 28,545             | 31,502          |
| Initial forest cover (%)                               | 95.22   | 97.46              | 98.64           |
| Euclidean distance to state capital                    | 1.993   | 1.968              | 3.083           |
| Euclidean distance to highways                         | 0.188   | 0.158              | 0.259           |
| Average slope                                          | 3.704   | 3.877              | 5.262           |
| Average soil quality                                   | 2.000   | 2.038              | 2.473           |
| Euclidean distance to urban areas                      | 0.486   | 0.741              | 0.634           |
| Euclidean distance to roads                            | 0.021   | 0.026              | 0.218           |
| Average cumulative deforestation (ha)                  | 88.021  | 70.223             | 1046.79         |
| Average annual deforestation (ha)                      | 9.375   | 8.150              | 145.417         |
| Proportion of primary forests in the buffer zone (%)   | 75.2    | 76.0               | 85.6            |
| Proportion of secondary forests in the buffer zone (%) | 8.1     | 6.6                | 2.4             |
| Proportion of pastures in the buffer zone (%)          | 11.8    | 13.3               | 7.0             |
| Proportion of agriculture in the buffer zone (%)       | 0.0     | 0.5                | 1.0             |
| Proportion of urban areas in the buffer zone (%)       | 0.0     | 0.0                | 0.0             |
| Mean squared prediction error (Loss V)                 | –       | 109.321            | –               |

\*Based on three synthetic-control donors, one Pará state, one from Acre state, and one from Amazonas state.

Table A2-6. REDD+ project: *Manoia REDD+ Project*

| Variable                                               | Project | Synthetic control* | Donor-pool mean |
|--------------------------------------------------------|---------|--------------------|-----------------|
| Area (ha)                                              | 72,899  | 72,858             | 70,370          |
| Initial forest cover (%)                               | 99.86   | 99.64              | 97.67           |
| Euclidean distance to state capital                    | 1.213   | 2.550              | 2.815           |
| Euclidean distance to highways                         | 0.238   | 0.297              | 0.276           |
| Average slope                                          | 4.096   | 5.994              | 5.679           |
| Average soil quality                                   | 2.000   | 2.061              | 2.450           |
| Euclidean distance to urban areas                      | 0.501   | 0.607              | 0.622           |
| Euclidean distance to roads                            | 0.146   | 0.536              | 0.296           |
| Average cumulative deforestation (ha)                  | 1.923   | 15.115             | 1326.224        |
| Average annual deforestation (ha)                      | 0.481   | 2.226              | 185.468         |
| Proportion of primary forests in the buffer zone (%)   | 93.4    | 94.0               | 85.6            |
| Proportion of secondary forests in the buffer zone (%) | 1.0     | 1.1                | 2.6             |
| Proportion of pastures in the buffer zone (%)          | 4.7     | 0.2                | 4.5             |
| Proportion of agriculture in the buffer zone (%)       | 0.0     | 0.0                | 0.4             |
| Proportion of urban areas in the buffer zone (%)       | 0.0     | 0.0                | 0.0             |
| Mean squared prediction error (Loss V)                 | –       | 8.120              | –               |

\*Based on five synthetic-control donors, one from Amazonas state, one from Mato Grosso state, two from Pará state, and one from Acre state.

Table A2-7. REDD+ project: *The Purus Project*

| Variable                                               | Project | Synthetic control* | Donor-pool mean |
|--------------------------------------------------------|---------|--------------------|-----------------|
| Area (ha)                                              | 35,195  | 34,186             | 33,347          |
| Initial forest cover (%)                               | 99.25   | 99.08              | 98.21           |
| Euclidean distance to state capital                    | 1.956   | 2.335              | 3.017           |
| Euclidean distance to highways                         | 0.19    | 0.129              | 0.276           |
| Average slope                                          | 5.202   | 6.712              | 5.158           |
| Average soil quality                                   | 4.000   | 3.905              | 2.371           |
| Euclidean distance to urban areas                      | 0.303   | 0.349              | 0.614           |
| Euclidean distance to roads                            | 0.176   | 0.23               | 0.19            |
| Average cumulative deforestation (ha)                  | 27.273  | 39.475             | 1495.718        |
| Average annual deforestation (ha)                      | 9.091   | 7.088              | 240.838         |
| Proportion of primary forests in the buffer zone (%)   | 98.4    | 95.8               | 84.5            |
| Proportion of secondary forests in the buffer zone (%) | 0.3     | 1.7                | 2.8             |
| Proportion of pastures in the buffer zone (%)          | 0.7     | 2.0                | 7.0             |
| Proportion of agriculture in the buffer zone (%)       | 0.0     | 0.0                | 0.0             |
| Proportion of urban areas in the buffer zone (%)       | 0.0     | 0.0                | 0.0             |
| Mean squared prediction error (Loss V)                 | –       | 187.141            | –               |

\*Based on three synthetic-control donors, one from Mato Grosso state and two from Amazonas state.

Table A2-8. REDD+ project: *Resex Rio Preto-Jacundá REDD+ Project*

| Variable                                               | Project | Synthetic control* | Donor-pool mean |
|--------------------------------------------------------|---------|--------------------|-----------------|
| Area (ha)                                              | 99,337  | 107,867            | 115,265         |
| Initial forest cover (%)                               | 99.70   | 95.77              | 94.88           |
| Euclidean distance to state capital                    | 1.644   | 3.139              | 3.169           |
| Euclidean distance to highways                         | 0.059   | 0.152              | 0.164           |
| Average slope                                          | 3.657   | 3.538              | 3.363           |
| Average soil quality                                   | 2.000   | 1.878              | 1.884           |
| Euclidean distance to urban areas                      | 0.519   | 0.962              | 0.824           |
| Euclidean distance to roads                            | 0.113   | 0.328              | 0.279           |
| Average cumulative deforestation (ha)                  | 133.333 | 143.032            | 178.542         |
| Average annual deforestation (ha)                      | 25.521  | 22.478             | 27.833          |
| Proportion of primary forests in the buffer zone (%)   | 84.1    | 79.5               | 73.1            |
| Proportion of secondary forests in the buffer zone (%) | 2.5     | 1.1                | 1.8             |
| Proportion of pastures in the buffer zone (%)          | 9.9     | 2.0                | 5.8             |
| Proportion of agriculture in the buffer zone (%)       | 0.0     | 0.0                | 0.0             |
| Proportion of urban areas in the buffer zone (%)       | 0.0     | 0.0                | 0.4             |
| Mean squared prediction error (Loss V)                 | –       | 1284.135           | –               |

\*Based on three synthetic-control donors from sustainable-use reserves.

Table A2-9. REDD+ project: *RMDLT Portel-Para REDD Project*

| Variable                                               | Project | Synthetic control* | Donor-pool mean |
|--------------------------------------------------------|---------|--------------------|-----------------|
| Area (ha)                                              | 194,550 | 180,027            | 162,053         |
| Initial forest cover (%)                               | 99.71   | 99.424             | 98.896          |
| Euclidean distance to state capital                    | 2.553   | 3.539              | 3.434           |
| Euclidean distance to highways                         | 0.298   | 0.295              | 0.206           |
| Average slope                                          | 4.683   | 6.043              | 5.065           |
| Average soil quality                                   | 2.000   | 3.992              | 3.278           |
| Euclidean distance to urban areas                      | 0.636   | 0.561              | 0.636           |
| Euclidean distance to roads                            | 0.129   | 0.435              | 0.225           |
| Average cumulative deforestation (ha)                  | 121.094 | 152.906            | 1399.609        |
| Average annual deforestation (ha)                      | 26.562  | 35.934             | 315.938         |
| Proportion of primary forests in the buffer zone (%)   | 94.3    | 97.3               | 92.1            |
| Proportion of secondary forests in the buffer zone (%) | 1.4     | 1.1                | 2.4             |
| Proportion of pastures in the buffer zone (%)          | 0.7     | 0.8                | 3.0             |
| Proportion of agriculture in the buffer zone (%)       | 0.0     | 0.0                | 0.8             |
| Proportion of urban areas in the buffer zone (%)       | 0.0     | 0.0                | 0.0             |
| Mean squared prediction error (Loss V)                 | –       | 1049.508           | –               |

\*Based on eight synthetic-control donors, three from Pará state, two from Amazonas state, and three from Acre state.

Table A2-10. REDD+ project: *The Russas Project*

| Variable                                               | Project | Synthetic control* | Donor-pool mean |
|--------------------------------------------------------|---------|--------------------|-----------------|
| Area (ha)                                              | 42,519  | 38,875             | 41,637          |
| Initial forest cover (%)                               | 99.35   | 99.26              | 99.22           |
| Euclidean distance to state capital                    | 5.128   | 3.607              | 2.759           |
| Euclidean distance to highways                         | 0.044   | 0.143              | 0.148           |
| Average slope                                          | 3.533   | 5.836              | 5.934           |
| Average soil quality                                   | 2.730   | 3.937              | 3.479           |
| Euclidean distance to urban areas                      | 0.174   | 0.343              | 0.481           |
| Euclidean distance to roads                            | 0.174   | 0.236              | 0.276           |
| Average cumulative deforestation (ha)                  | 102.083 | 107.934            | 216.732         |
| Average annual deforestation (ha)                      | 16.146  | 17.263             | 35.677          |
| Proportion of primary forests in the buffer zone (%)   | 94.9    | 92.1               | 93.2            |
| Proportion of secondary forests in the buffer zone (%) | 2.8     | 2.6                | 2.1             |
| Proportion of pastures in the buffer zone (%)          | 1.9     | 4.7                | 4.2             |
| Proportion of agriculture in the buffer zone (%)       | 0.0     | 0.0                | 0.0             |
| Proportion of urban areas in the buffer zone (%)       | 0.0     | 0.0                | 0.0             |
| Mean squared prediction error (Loss V)                 | –       | 95.576             | –               |

\*Based on eight synthetic-control donors from Acre state.

Table A2-11. REDD+ project: *Suruí Forest Carbon Project*

| Variable                                               | Project | Synthetic control* | Donor-pool mean |
|--------------------------------------------------------|---------|--------------------|-----------------|
| Area (ha)                                              | 247,796 | 258,174            | 218,195         |
| Initial forest cover (%)                               | 98.68   | 98.53              | 98.57           |
| Euclidean distance to state capital                    | 3.493   | 3.702              | 3.459           |
| Euclidean distance to highways                         | 0.193   | 0.275              | 0.319           |
| Average slope                                          | 5.809   | 5.882              | 4.714           |
| Average soil quality                                   | 4.359   | 1.937              | 2.106           |
| Euclidean distance to urban areas                      | 0.314   | 0.647              | 0.603           |
| Euclidean distance to roads                            | 0.097   | 0.127              | 0.193           |
| Average cumulative deforestation (ha)                  | 971.528 | 1010.878           | 853.725         |
| Average annual deforestation (ha)                      | 244.444 | 214.523            | 171.086         |
| Proportion of primary forests in the buffer zone (%)   | 44.8    | 59.6               | 71.3            |
| Proportion of secondary forests in the buffer zone (%) | 7.8     | 5.5                | 3.7             |
| Proportion of pastures in the buffer zone (%)          | 46.4    | 30.5               | 19.0            |
| Proportion of agriculture in the buffer zone (%)       | 0.0     | 0.0                | 0.0             |
| Proportion of urban areas in the buffer zone (%)       | 0.0     | 0.1                | 0.0             |
| Mean squared prediction error (Loss V)                 | –       | 15,703.52          | –               |

\*Based on eight synthetic-control donors from indigenous lands.

Table A2-12. REDD+ project: *The Valparaiso Project*

| Variable                                               | Project | Synthetic control* | Donor-pool mean |
|--------------------------------------------------------|---------|--------------------|-----------------|
| Area (ha)                                              | 28,988  | 29,767             | 29,700          |
| Initial forest cover (%)                               | 98.90   | 99.12              | 99.11           |
| Euclidean distance to state capital                    | 5.050   | 2.731              | 2.69            |
| Euclidean distance to highways                         | 0.124   | 0.148              | 0.136           |
| Average slope                                          | 3.621   | 5.221              | 5.874           |
| Average soil quality                                   | 3.243   | 3.49               | 3.733           |
| Euclidean distance to urban areas                      | 0.297   | 0.417              | 0.581           |
| Euclidean distance to roads                            | 0.181   | 0.242              | 0.311           |
| Average cumulative deforestation (ha)                  | 127.841 | 130.909            | 108.295         |
| Average annual deforestation (ha)                      | 25.000  | 25.178             | 20.076          |
| Proportion of primary forests in the buffer zone (%)   | 96.8    | 92.3               | 95.6            |
| Proportion of secondary forests in the buffer zone (%) | 1.7     | 2.7                | 1.9             |
| Proportion of pastures in the buffer zone (%)          | 1.3     | 4.3                | 2.1             |
| Proportion of agriculture in the buffer zone (%)       | 0.0     | 0.0                | 0.0             |
| Proportion of urban areas in the buffer zone (%)       | 0.0     | 0.0                | 0.0             |
| Mean squared prediction error (Loss V)                 | –       | 128.364            | –               |

\*Based on six synthetic-control donors from Acre state.
